# Supplementary material for: High glucose uptake unexpectedly is accompanied by high levels of the mitochondrial β-F1-ATPase subunit in head and neck squamous cell carcinoma
Source: PubMed Central journal article supplement (PMC4742169; doi:10.18632/oncotarget.5459), 2015-10-06
Supplement: oncotarget-06-36172-s001.pdf [file oncotarget-06-36172-s001.pdf]

## SUPPLEMENTARY FIGURES AND TABLES

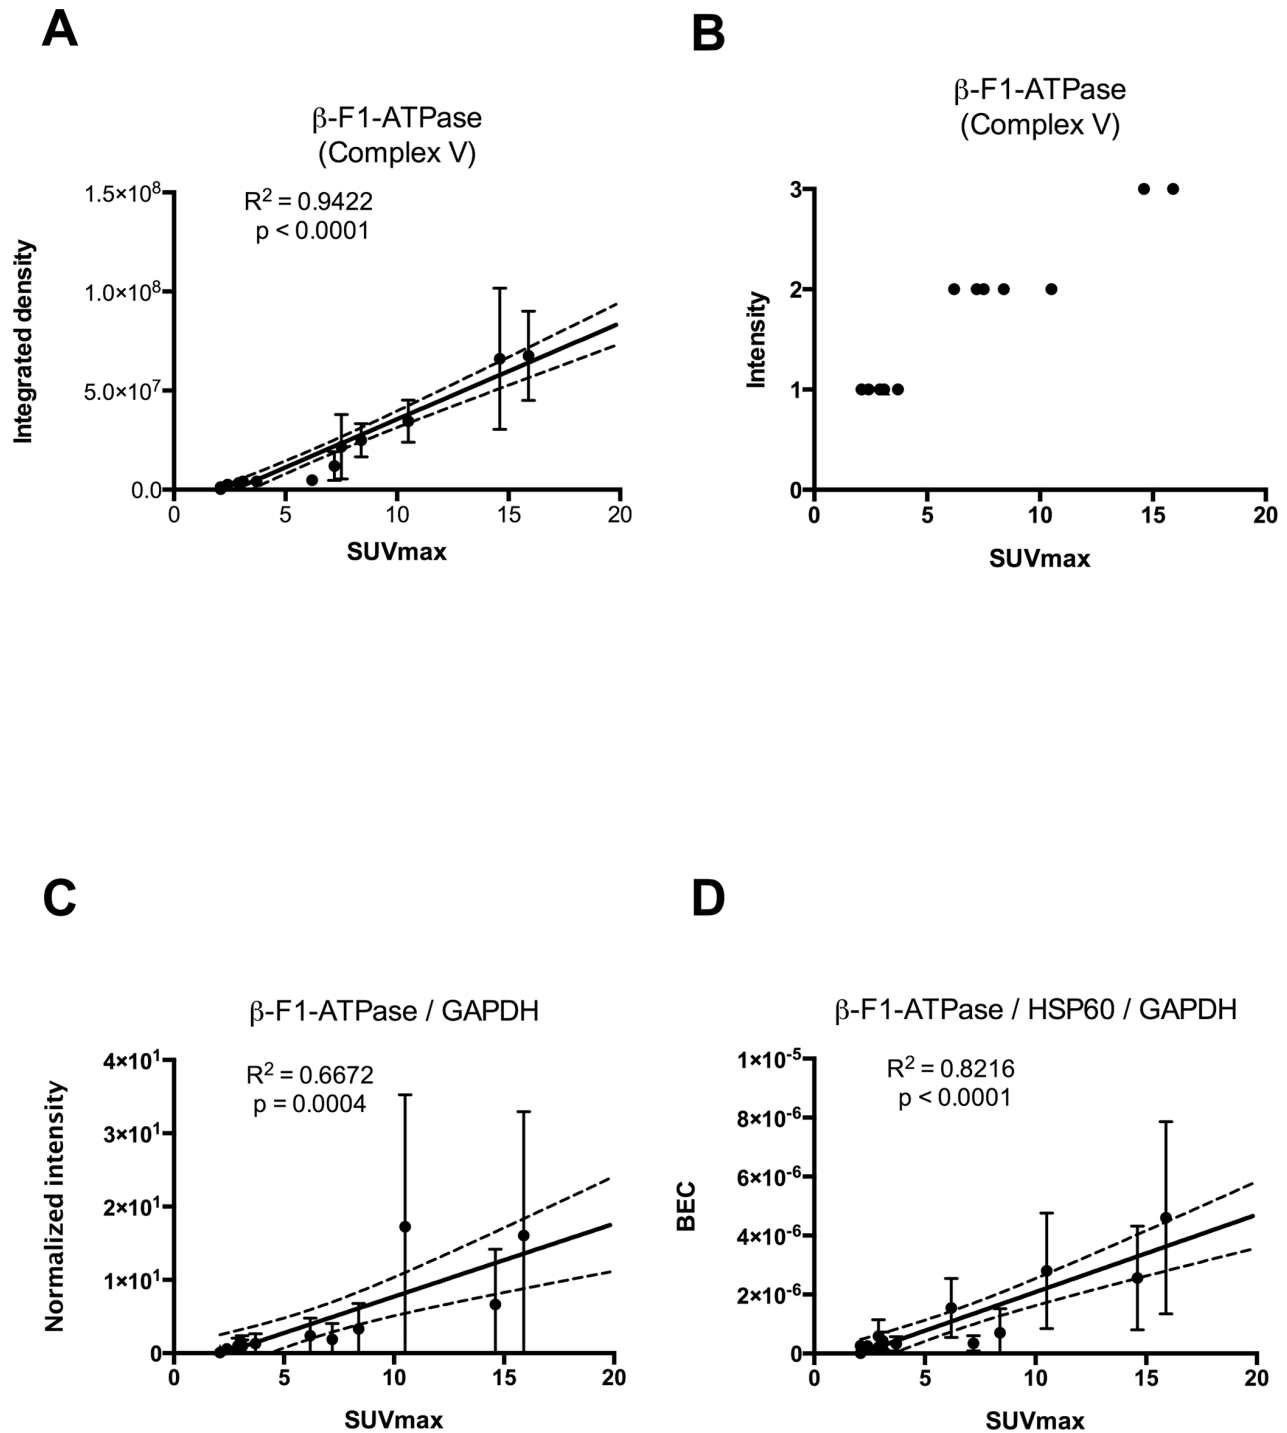

**Supplementary Figure S1: Overview of  $\beta$ -F1-ATPase staining intensities without (A, B) and with normalization to other proteins (C, D; arbitrary units) in HNSCCs.** Graphs (A) and (D) have been already shown as regular Figures (Figure 3) and are repeated here for better comparison **A.** Regression analysis of  $\beta$ -F1-ATPase staining intensity vs. SUVmax. **B.** Semi-quantification of  $\beta$ -F1-ATPase staining intensity vs. SUVmax as assessed by a trained pathologist. **C.** Normalization of  $\beta$ -F1-ATPase staining intensity to GAPDH. **D.** Regression analysis of BEC index vs. SUVmax. BEC index = Bioenergetic cellular index, SUVmax = maximum standard uptake values.

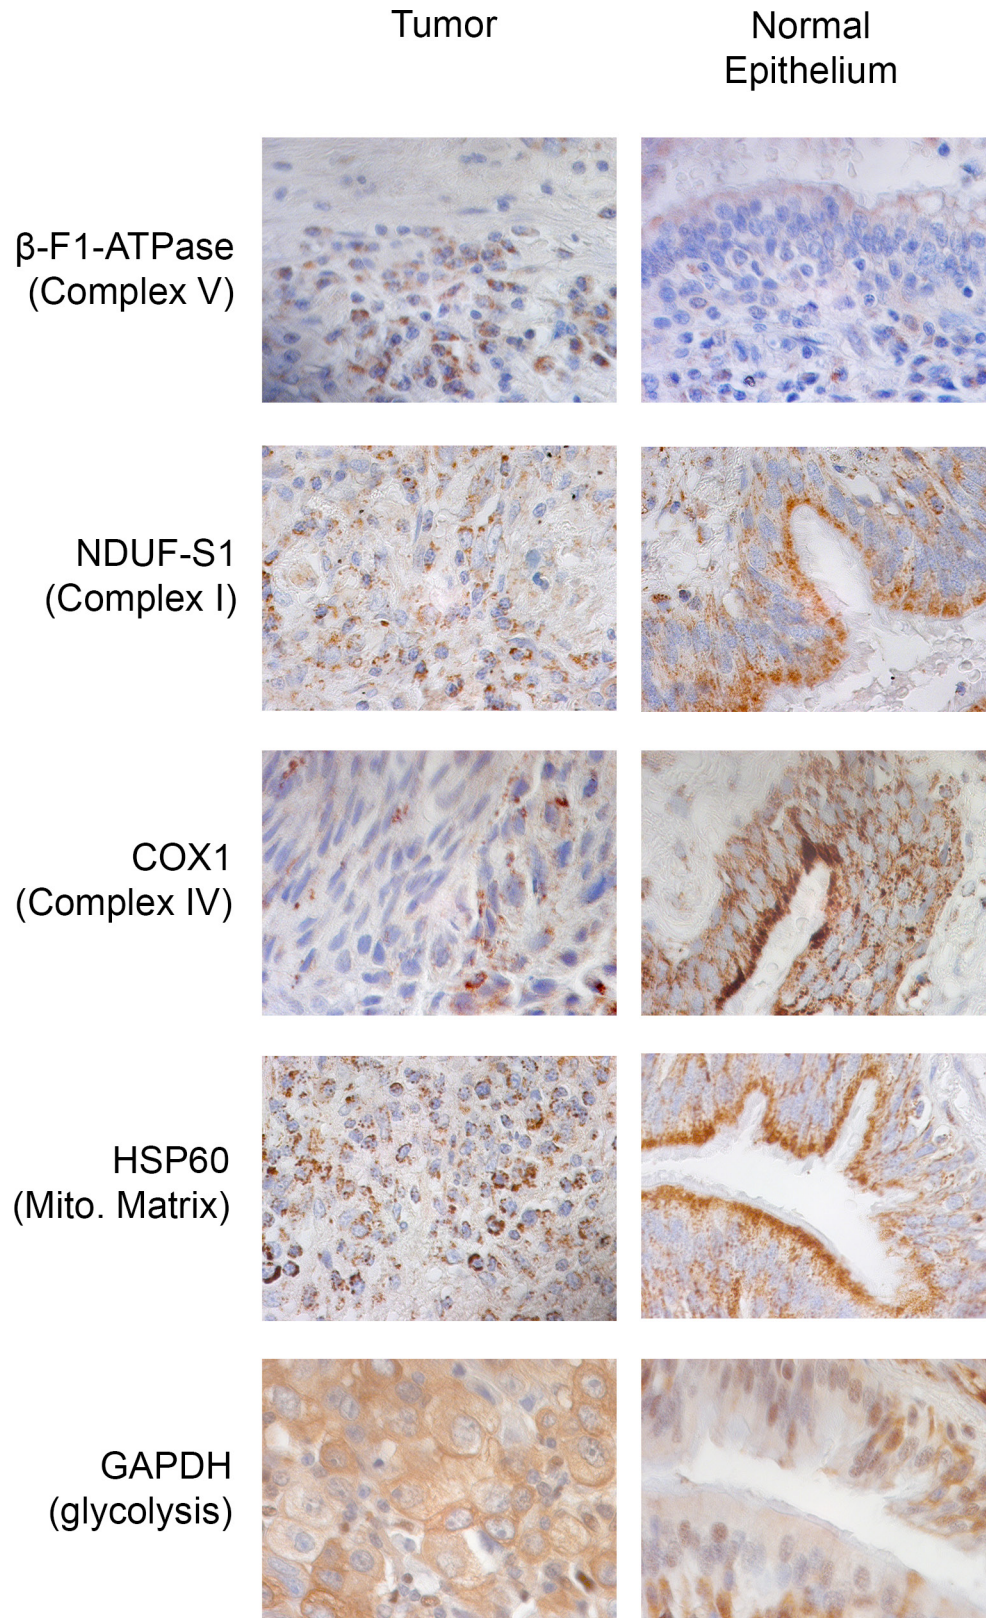

Supplementary Figure S2: Representative immunohistochemical stainings of non-small cell lung cancer (NSCLC) (magnification x1000). Mito. Matrix = Mitochondrial matrix.

**A**

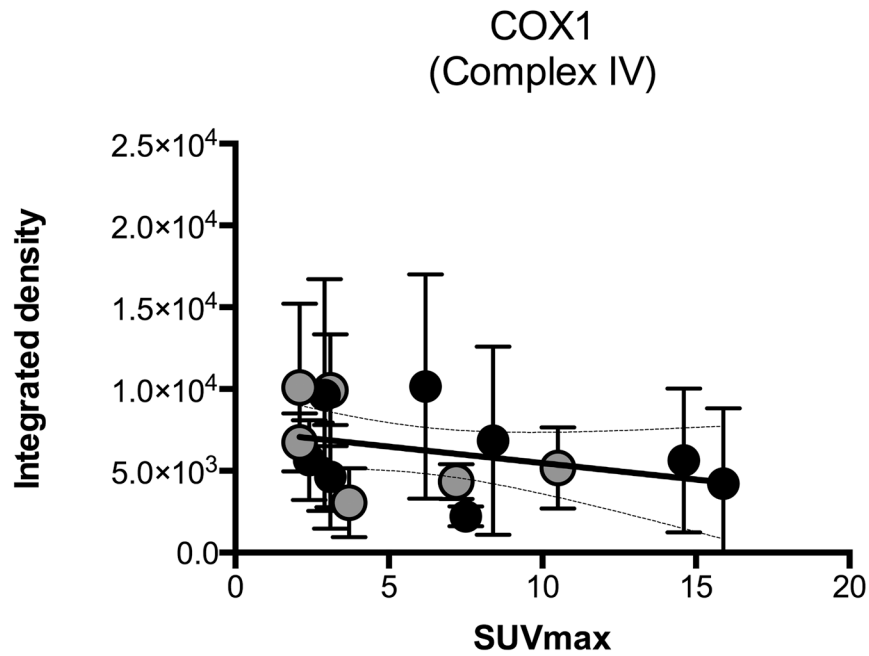

**B**

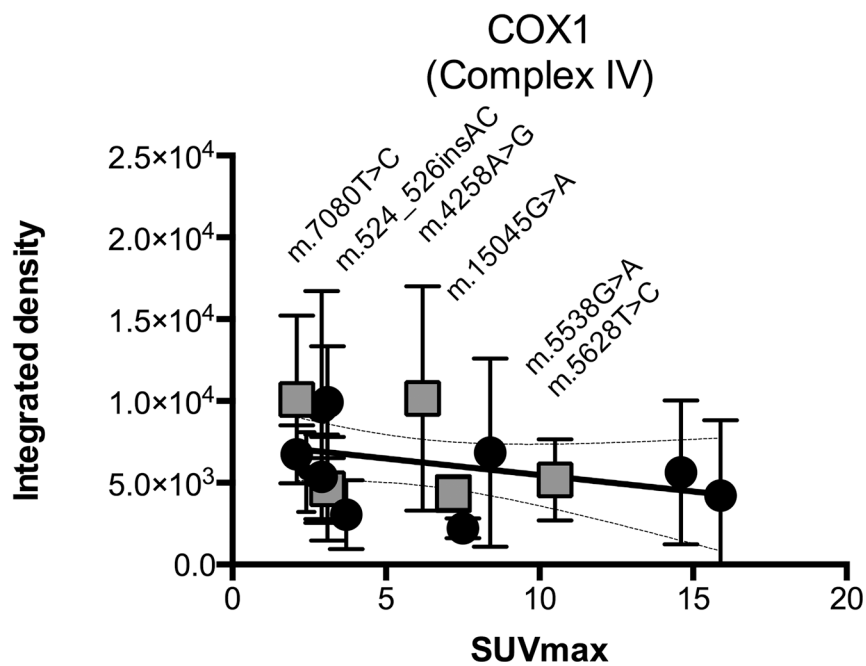

**Supplementary Figure S3: Regression analysis of staining intensities for COX 1 subunit of complex IV vs. SUVmax, as shown in Figure 3 in HNSCCs. A.** Cases with p53 positive nuclear immunostaining, which are at the same time negative for HPV16 infection, are indicated by grey circles. **B.** Tumors with mtDNA mutations and their positions in the sequence are indicated by a rectangle. SUVmax = maximum standard uptake values.

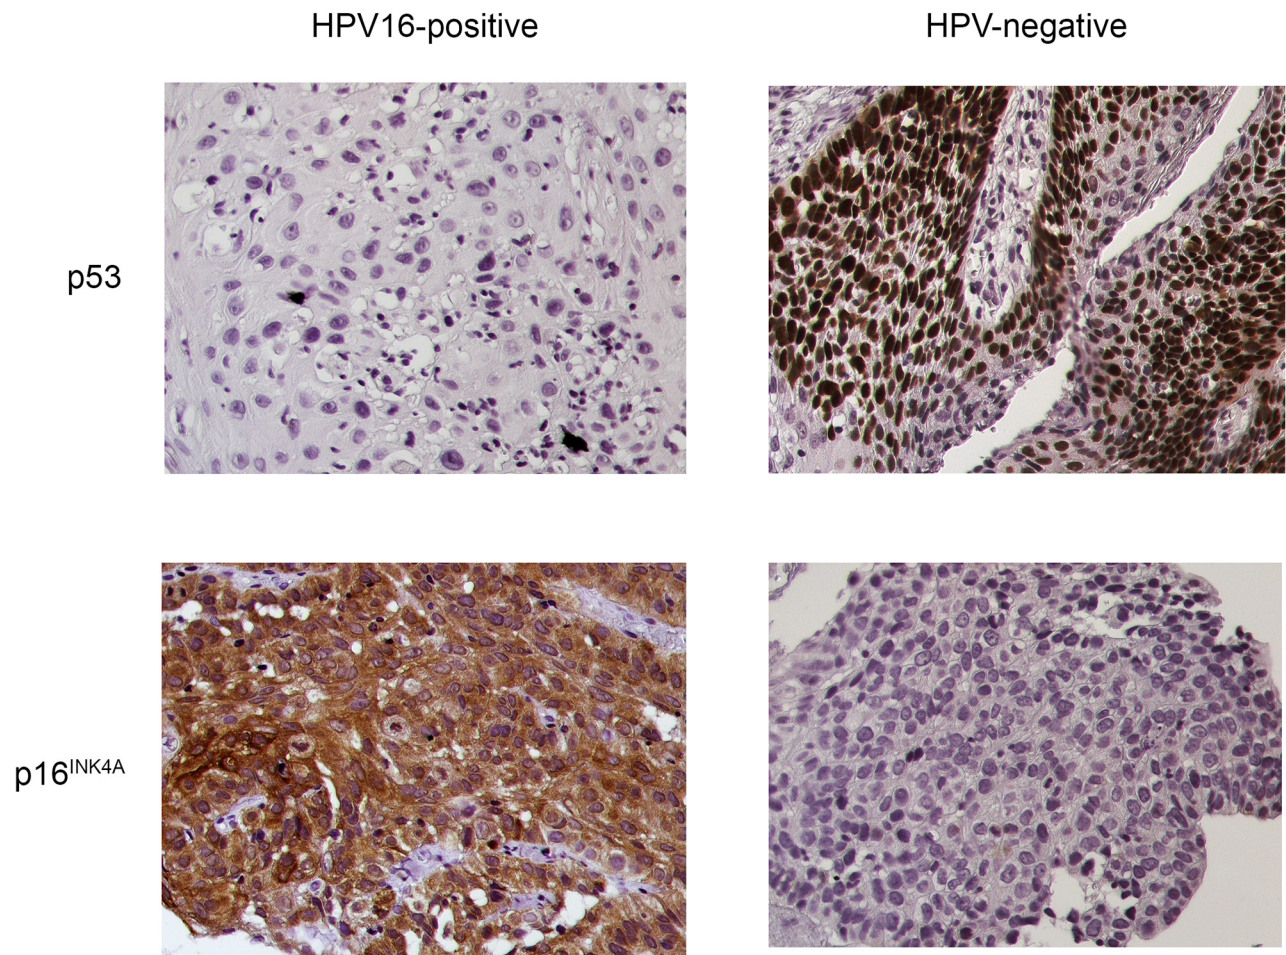

Supplementary Figure S4: Immunohistochemical staining demonstrating absence of p53 positive nuclei in HPV16-positive HNSCCs, which are positive for p16<sup>INK4A</sup> as surrogate marker (magnification x400).

$\beta$ -F1-ATPase  
(Complex V)

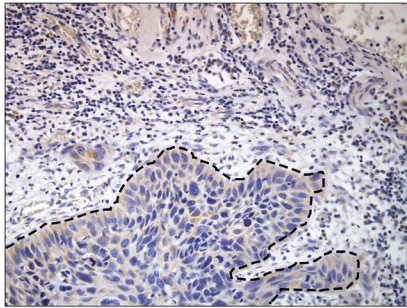

NDUF-S1  
(Complex I)

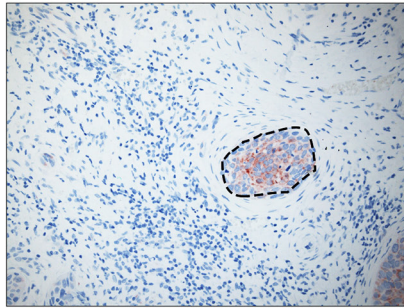

COX1  
(Complex IV)

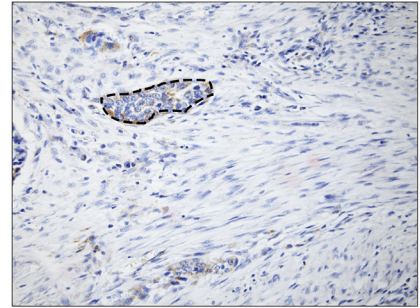

HSP60  
(Mito. Matrix)

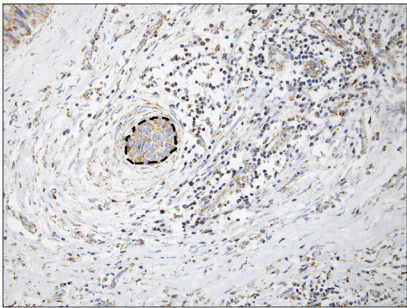

GAPDH  
(glycolysis)

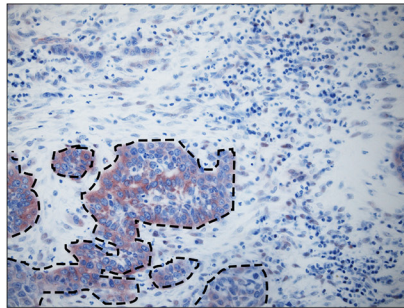

**Supplementary Figure S5: Immunohistochemical stainings demonstrating differences between tumor cells and tumor stroma (magnification x400) in HNSCCs.** Tumor regions are marked by black dotted lines. Mito. Matrix = Mitochondrial Matrix.

**Supplementary Table S1: Primer sequences used for PCR amplification of the mitochondrial genome (R) as well as HPV16 sequences (A).**

| Primer name | Sequence                     |
|-------------|------------------------------|
| R1          | ACTCCACCATTAGCACCCAAAGC      |
| R2          | CATAAAGCCTAAATAGCCCACACG     |
| R3          | ACACCGCTGCTAACCCCATAC        |
| R4          | AGCTAAGACCCAAACTGGGATT       |
| R5          | AGTGCACTTGGACGAACCAGAG       |
| R6          | CAAAGAGGAACAGCTCTTTGGA       |
| R7          | ACCTGTATGAATGGCTCCAC         |
| R8          | GAGAAATAAGGCCTACTTCACAAAGC   |
| R9          | GAAGTAGTCTCAGGCTTCAACATCG    |
| R10         | CGGACAATGAACCATAACCAATACTA   |
| R11         | CCTTACCACGCTACTCCTACCTATCTCC |
| R12         | CAATTCAATATGAAAATCACCTCGG    |
| R13         | CTTAGGGGCCATCAATTCATCAC      |
| R14         | CCCACCTTCCACTATGTCCTATCAAT   |
| R15         | CACATTCGAAGAACCCGTATACATAAA  |
| R16         | CCACAGTTTCATGCCCATCGTCC      |
| R17         | CCCCTCTAGAGCCCCTGTGA         |
| R18         | CTGTCGCCTTAATCCAAGCCTACG     |
| R19         | GCCTGATACTGGCATTTTGT         |
| R20         | CACCTCATATCCTCCCTACTATGC     |
| R21         | GCTCCCTTCCCCTACTCATC         |
| R22         | CACGTTCTCCTGATCAAATATCAC     |
| R23         | TCATCCCTGTAGCATTGTTCG        |
| R24         | CTCCACCCCCTAGCAGAA           |
| R25         | TCGCTACCTCCCTGACAAGC         |
| R26         | CCTCAACCCAAAAAGGCATAA        |
| R27         | CCCCATAAATAGGAGAAGGCTTA      |
| R28         | CCTGAAACATCGGCATTATCC        |
| R29         | CCACATCAAGCCCGAATGA          |
| R30         | TGGAGAGCTCCCGTGAGTGGTT       |
| R31         | GGTGATGTGAGCCCGTCTAAAC       |
| R32         | AGTGTCTGCGGAGCAGTTTTG        |
| R33         | GGTTTAGCTCAGAGCGGTCAAG       |
| R34         | GGGTCTTCTCGTCTTGCTGTGT       |
| R35         | GGCTCTGCCATCTTAACAAACC       |
| R36         | CTAGGAAGATTGTAGTGGTGAGGGTG   |

(Continued)

| Primer name | Sequence                      |
|-------------|-------------------------------|
| R37         | TGCCTTGGGTAACCTCTGGGACTC      |
| R38         | TTGCGTTCAGTTGATGCAGAGTGG      |
| R39         | CTCCAGCTCATGCGCCGAATAATAG     |
| R40         | TAGGACTGCTGTGATTAGGACGG       |
| R41         | TGGATTTTGGCGTAGGTTTGGTCT      |
| R42         | GGAAAATGATTATGAGGGCGTGAT      |
| R43         | CGGTAGTATTTAGTTGGGGCATTTCAC   |
| R44         | GATAGGCATGTGATTGGTGGG         |
| R45         | GAATGTTGTCAAACTAGTTAATTGGAAGT |
| R46         | GGCGCAAAGACTAGTATGG           |
| R47         | TTCTTGGGCAGTGAGAGTGA          |
| R48         | CCCCATTGTGTTGTGGTAAA          |
| R49         | GAAGAACTGATTAATGTTTGGGTCT     |
| R50         | GTGGTGATAGCGCCTAAGCA          |
| R51         | GGGTGGGGTTATTTTCGTTAATGT      |
| R52         | GAGATTGCTCGGGGAATAG           |
| R53         | GGTTGTAGCCGTGCGAGAA           |
| R54         | ACTGTGGCCCCTCAGAATGA          |
| R55         | CAAGGACGCCTCCTAGTTTG          |
| R56         | CGGTTGTTGATGGGTGAGT           |
| A5          | TATTYTSCTWCTCCYAGTGG          |
| A6          | GCMCAGGGMCAYAAYAATGG          |
| A8          | CAAARTTCCARTCYTCCAA           |
| A10         | CKTCCCAARGGAWAYTGRTC          |

### Supplementary Table S2: Combination of primers used for amplification of the mitochondrial genome.

Primer names are indicated according to Table 2. Fragment length in base pairs (bp). Positions in the mitochondrial genome are given according to the revised Cambridge consensus sequence (GenBank RefSeq database: NC\_012920; <http://www.ncbi.nlm.nih.gov/nucore/251831106>).

| Primer pairs | Fragment length (bp) | Section of mt-DNA |
|--------------|----------------------|-------------------|
| 1: R1/R30    | 640                  | 15974 - 45        |
| 2: R2/R31    | 687                  | 16520 - 638       |
| 3: R3/R32    | 623                  | 521 - 1144        |
| 4: R4/R33    | 622                  | 1057 - 1679       |
| 5: R6/R34    | 628                  | 2101 - 2729       |
| 6: R7/R35    | 624                  | 2622 - 3246       |
| 7: R8/R36    | 899                  | 3137- 4036        |
| 8: R9/R37    | 911                  | 3921 - 4832       |
| 9: R10/R38   | 913                  | 4712 - 5625       |
| 10: R11/R39  | 523                  | 5462 - 5985       |
| 11: R12/R40  | 687                  | 5798 - 6485       |
| 12: R13/R41  | 764                  | 6377 - 7141       |
| 13: R14/ R42 | 655                  | 7027 - 7682       |
| 14: R15/ R43 | 973                  | 7413 - 8386       |
| 15: R16/R44  | 1037                 | 8194 - 9231       |
| 16: R18/R45  | 907                  | 9140 - 10047      |
| 17: R19/R46  | 752                  | 9921 - 10673      |
| 18: R20/R47  | 772                  | 10542 - 11314     |
| 19: R21/R48  | 783                  | 11226 - 12009     |
| 20: R22/R49  | 779                  | 11911 - 12690     |
| 21: R23/R50  | 588                  | 12602 - 13190     |
| 22: R24/R51  | 563                  | 13122 - 13685     |
| 23: R25/R52  | 592                  | 13577 - 14169     |
| 24: R26/R53  | 629                  | 14066 - 14695     |
| 25: R27/R54  | 592                  | 14588 -15180      |
| 26: R28/R55  | 542                  | 15081 - 15623     |
| 27: R29/R56  | 540                  | 15544 - 16084     |



**Supplementary Table S3: mtDNA polymorphisms found in 6 tumor samples, compared to the revised reference sequence.**

(GenBank RefSeq database: NC\_012920; <http://www.ncbi.nlm.nih.gov/nuccore/251831106>).

| patient | mtDNA-position | polymorphism | homo-plasmy | AA-change                                | locus          |
|---------|----------------|--------------|-------------|------------------------------------------|----------------|
| 1       | 73             | A → G        | 100%        |                                          | Control region |
|         | 263            | A → G        | 100%        |                                          | Control region |
|         | 315            | C → CC       | 100%        |                                          | Control region |
|         | 497            | C → T        | 100%        |                                          | Control region |
|         | 1189           | T → C        | 100%        |                                          | Noncoding      |
|         | 1438           | A → G        | 100%        |                                          | Noncoding      |
|         | 2706           | A → G        | 100%        |                                          | Noncoding      |
|         | 3480           | A → G        | 100%        | Syn                                      | NADH/1         |
|         | 4295           | A → G        | 100%        |                                          | Noncoding      |
|         | 4769           | A → G        | 100%        | Syn                                      | NADH/2         |
|         | 6260           | G → A        | 100%        | Syn                                      | Cox/1          |
|         | 7028           | C → T        | 100%        | Syn                                      | Cox /1         |
|         | 8860           | A → G        | 100%        | Threonine → Alanine                      | ATP-Synthase/6 |
|         | 9377           | A → G        | 100%        | Syn                                      | Cox/3          |
|         | 9698           | T → C        | 100%        | Syn                                      | Cox/3          |
|         | 10398          | A → G        | 100%        | Threonine → Alanine                      | NADH/3         |
|         | 10550          | A → G        | 100%        | Syn                                      | NADH/4L        |
|         | 11251          | A → G        | 100%        | Syn                                      | NADH/4         |
|         | 11467          | A → G        | 100%        | Syn                                      | NADH/4         |
|         | 11485          | T → C        | 100%        | Syn                                      | NADH/4         |
|         | 11719          | G → A        | 100%        | Syn                                      | NADH/4         |
|         | 11840          | C → T        | 100%        | Syn                                      | NADH/4         |
|         | 12308          | A → G        | 100%        |                                          | Noncoding      |
|         | 12372          | G → A        | 100%        | Syn                                      | NADH/5         |
|         | 13740          | T → C        | 100%        | Syn                                      | NADH/5         |
|         | 14167          | C → T        | 100%        | Syn                                      | NADH/6         |
|         | 14766          | C → T        | 100%        | Threonine → Isoleucine                   | Cytochrom b    |
|         | 14798          | T → C        | 100%        |                                          | Cytochrom b    |
|         | 15326          | A → G        | 100%        | Syn                                      | Cytochrom b    |
|         | 15884          | G → A        | 100%        | Alanine → Glycine<br>Alanine → Threonine | Cytochrom b    |
|         | 16224          | T → C        | 100%        |                                          | Control region |
|         | 16245          | C → T        | 100%        |                                          | Control region |

(Continued)

| patient | mtDNA-position | polymorphism | homo-plasmy            | AA-change           | locus          |
|---------|----------------|--------------|------------------------|---------------------|----------------|
| 2       | 16311          | T → C        | 100%                   |                     | Control region |
|         | 119            | T → C        | 100%                   |                     | Control region |
|         | 189            | A → G        | 100%                   |                     | Control region |
|         | 195            | T → C        | 100%                   |                     | Control region |
|         | 204            | T → C        | 100%                   |                     | Control region |
|         | 207            | G → A        | 100%                   |                     | Control region |
|         | 263            | A → G        | 100%                   |                     | Control region |
|         | 315            | C → CC C →   | 100%                   |                     | Control region |
|         | 709            | CCG → A      | 100%                   |                     | Noncoding      |
|         | 750            | A → G        | 100%                   |                     | Noncoding      |
|         | 1243           | T → C        | 100%                   |                     | Noncoding      |
|         | 1438           | A → G        | 100%                   |                     | Noncoding      |
|         | 2706           | A → G        | 100%                   |                     | Noncoding      |
|         | 3505           | A → G        | 100%                   | Threonine → Alanine | NADH/1         |
|         | 4769           | A → G        | 100%                   | Syn                 | NADH/2         |
|         | 5046           | G → A        | 100%                   | Valine → Isoleucine | NADH/2         |
|         | 5460           | G → A        | 100%                   | Alanine → Threonine | NADH/2         |
|         | 5580           | T → C        | 100%                   |                     | Noncoding      |
|         | 7028           | C → T        | 100%                   | Syn                 | Cox/1          |
| 7864    | C → T          | 100%         | Syn                    | Cox/2               |                |
| 8860    | A → G          | 100%         | Threonine → Alanine    | ATP-Synthase/ 6     |                |
| 8994    | G → A          | 100%         | Syn                    | ATP-Synthase/6      |                |
| 11674   | C → T          | 100%         | Syn                    | NADH/4              |                |
| 11719   | G → A          | 100%         | Syn                    | NADH/4              |                |
| 11947   | A → G          | 100%         | Syn                    | NADH/4              |                |
| 12414   | T → C          | 100%         | Syn                    | NADH/5              |                |
| 12705   | C → T          | 100%         | Syn                    | NADH/5              |                |
| 14766   | C → T          | 100%         | Threonine → Isoleucine | Cytochrom b         |                |
| 15326   | A → G          | 100%         | Alanine → Glycine      | Cytochrom b         |                |
| 15884   | G → C          | 100%         | Alanine → Threonine    | Cytochrom b         |                |
| 16158   | A → G          | 22%          |                        | Control region      |                |
| 16292   | C → T          | 100%         |                        | Control region      |                |
| 16519   | T → C          | 100%         |                        | Control region      |                |
| 6       | 73             | A → G        | 100%                   |                     | Control region |
|         | 152            | T → C        | 100%                   |                     | Control region |
|         | 217            | T → C        | 100%                   |                     | Control region |

(Continued)

| patient  | mtDNA-position | polymorphism | homo-plasmy | AA-change              | locus          |
|----------|----------------|--------------|-------------|------------------------|----------------|
|          | 263            | A → G        | 100%        |                        | Control region |
|          | 310            | T → C        | 100%        |                        | Control region |
|          | 340            | C → T        | 100%        |                        | Control region |
|          | 508            | A → G        | 100%        |                        | Control region |
|          | 750            | A → G        | 100%        |                        | Noncoding      |
|          | 1438           | A → G        | 100%        |                        | Noncoding      |
|          | 2706           | A → G        | 100%        |                        | Noncoding      |
|          | 3116           | C → T        | 100%        |                        | Noncoding      |
|          | 3720           | A → G        | 100%        | Syn                    | NADH/1         |
|          | 4769           | A → G        | 100%        | Syn                    | NADH/2         |
|          | 5390           | A → G        | 100%        | Syn                    | NADH/2         |
|          | 5426           | T → C        | 100%        | Syn                    | NADH/2         |
|          | 6045           | C → T        | 100%        | Syn                    | Cox/1          |
|          | 6152           | T → C        | 100%        | Syn                    | Cox/1          |
|          | 7028           | C → T        | 100%        | Syn                    | Noncoding      |
|          | 8860           | A → G        | 100%        | Threonine → Alanine    | ATP-Synthase/6 |
|          | 10876          | A → G        | 100%        | Syn                    | NADH/4         |
|          | 11197          | C → T        | 100%        | Syn                    | NADH/4         |
|          | 11467          | A → G        | 100%        | Syn                    | NADH/4         |
|          | 11719          | G → A        | 100%        | Syn                    | NADH/4         |
|          | 11732          | T → C        | 100%        | Syn                    | NADH/4         |
|          | 12308          | A → G        | 100%        |                        | Noncoding      |
|          | 12372          | G → A        | 100%        | Syn                    | NADH/5         |
|          | 13020          | T → C        | 100%        | Syn                    | NADH/5         |
|          | 13734          | T → C        | 100%        | Syn                    | NADH/5         |
|          | 14766          | C → T        | 100%        | Threonine → Isoleucine | Cytochrom b    |
|          | 15326          | A → G        | 100%        | Alanine → Glycine      | Cytochrom b    |
|          | 15907          | A → G        | 100%        |                        | Noncoding      |
|          | 16051          | A → G        | 100%        |                        | Control region |
| <b>8</b> | 73             | A → G        | 100%        |                        | Control region |
|          | 263            | A → G        | 100%        |                        | Control region |
|          | 315            | C → CC C → T | 100%        |                        | Control region |
|          | 497            | A → G        | 100%        |                        | Control region |
|          | 750            | T → C        | 100%        |                        | Noncoding      |
|          | 1189           | A → G        | 100%        |                        | Noncoding      |
|          | 1438           | A → G        | 100%        |                        | Noncoding      |

(Continued)

| patient   | mtDNA-position | polymorphism | homo-plasmy | AA-change              | locus          |
|-----------|----------------|--------------|-------------|------------------------|----------------|
|           | 2706           | A → G        | 100%        |                        | Noncoding      |
|           | 3480           | T → C        | 100%        | Syn                    | NADH/1         |
|           | 3552           | A → G        | 100%        | Syn                    | NADH/2         |
|           | 4769           | A → G        | 100%        | Syn                    | Cox/1          |
|           | 6060           | C → CC A → G | 100%        | Isoleucine → Valine    | Cox/1          |
|           | 7028           | T → C        | 100%        | Syn                    | Noncoding      |
|           | 8860           | A → G        | 100%        | Threonine → Alanine    | ATP-Synthase6  |
|           | 9698           | T → C        | 100%        | Syn                    | Cox/3          |
|           | 11251          | A → G        | 100%        | Syn                    | NADH/4         |
|           | 11299          | G → A        | 100%        | Syn                    | NADH/4         |
|           | 11467          | G → A        | 100%        | Syn                    | NADH/4         |
|           | 11719          | A → G        | 100%        | Syn                    | NADH/4         |
|           | 11914          | G → A        | 100%        | Syn                    | NADH/4         |
|           | 12308          | C → T        | 61%         |                        | Noncoding      |
|           | 12372          | C → T        | 73%         | Syn                    | NADH/5         |
|           | 14167          | T → C        | 100%        | Syn                    | NADH/6         |
|           | 14766          | A → G        | 100%        | Threonine → Isoleucine | Cytochrom b    |
|           | 14798          | G → A        | 100%        |                        | Cytochrom b    |
|           | 15799          | T → C        | 100%        | Syn                    | Cytochrom b    |
|           | 16129          | T → C        | 100%        | Syn                    | Control region |
|           | 16224          | T → C        | 100%        |                        | Control region |
|           | 16311          |              | 100%        |                        | Control region |
|           | 16519          |              | 100%        |                        | Control region |
| <b>11</b> | 709            | G → A        | 100%        |                        | Noncoding      |
|           | 750            | A → G        | 100%        |                        | Noncoding      |
|           | 1438           | A → G        | 100%        |                        | Noncoding      |
|           | 2706           | A → G        | 100%        |                        | Noncoding      |
|           | 2850           | T → C        | 100%        |                        | Noncoding      |
|           | 4216           | T → C        | 100%        | Tyrosine → Histidine   | NADH/1         |
|           | 4769           | A → G        | 100%        | Syn                    | NADH/2         |
|           | 4917           | A → G        | 100%        | Asparagine → Aspartate | NADH/2         |
|           | 4931           | C → T        | 100%        |                        | NADH/2         |
|           | 7022           | T → C        | 100%        | Syn,                   | Cox/1          |
|           | 7028           | C → T        | 100%        | Syn                    | Cox/1          |
|           | 7702           | G → A        | 45%         | Syn                    | Cox/2          |

(Continued)

| patient   | mtDNA-position | polymorphism | homo-plasmy | AA-change              | locus          |
|-----------|----------------|--------------|-------------|------------------------|----------------|
|           | 8697           | G → A        | 100%        | Syn                    | ATP-Synthase/6 |
|           | 8860           | A → G        | 100%        | Syn                    | ATP-Synthase/6 |
|           | 9545           | A → G        | 100%        | Threonine → Alanine    | Cox/3          |
|           | 10463          | T → C        | 100%        | Syn                    | Noncoding      |
|           | 11251          | A → G        | 100%        |                        | NADH/4         |
|           | 11719          | G → A        | 100%        | Syn                    | NADH/4         |
|           | 11812          | A → G        | 100%        | Syn                    | NADH/4         |
|           | 13368          | G → A        | 100%        | Syn                    | NADH/5         |
|           | 13965          | T → C        | 100%        | Syn                    | NADH/5         |
|           | 14233          | A → G        | 100%        | Syn                    | NADH/6         |
|           | 14766          | C → T        | 100%        | Syn                    | Cytochrome b   |
|           | 14905          | G → A        | 100%        | Threonine → Isoleucine | Cytochrome b   |
|           | 15326          | A → G        | 100%        | Syn                    | Cytochrome b   |
|           | 15452          | C → A        | 100%        | Alanine → Glycine      | Cytochrome b   |
|           | 15928          | G → A        | 100%        | Leucine → Isoleucine   | Noncoding      |
|           | 16126          | T → C        | 100%        |                        | Control region |
|           | 16294          | C → T        | 100%        |                        | Control region |
|           | 16519          | T → C        | 100%        |                        | Control region |
| <b>16</b> | 43             | C → CC A → G | 100%        |                        | Control region |
|           | 750            | A → G        | 100%        |                        | Noncoding      |
|           | 1438           | T → C        | 100%        |                        | Noncoding      |
|           | 3866           | A → G        | 100%        | Isoleucine Threonine   | NADH/1         |
|           | 4769           | A → G        | 100%        | Syn                    | NADH/2         |
|           | 8860           | C → T        | 100%        | Threonine → Alanine    | ATP-Synthase/6 |
|           | 11674          | G → A        | 100%        | Syn                    | NADH/4         |
|           | 11719          | A → G        | 100%        | Syn                    | NADH/4         |
|           | 11947          | A → G        | 100%        | Syn                    | NADH/4         |
|           | 15326          | C → T        | 100%        | Alanine → Glycine      | Cytochrome b   |
|           | 16261          | T → C        | 100%        |                        | Control region |
|           | 16519          |              | 100%        |                        | Control region |
